# Supplementary material
Source: HighWire-hosted journal article supplement (https://oem.bmj.com/content/oemed-2019-105706)

**Supplementary Table 1.** The Most Frequent Occupational Categories and Corresponding Geometric Mean ELF-MF Exposure Estimates in CLIC Pooled Case-Control Dataset. Occupations and Exposure Estimates Were Retrieved From ELF-MF JEM Developed for INTEROCC Study (23).

| ISCO code            | Occupation                                                     | Geometric mean magnetic field ( $\mu\text{T}$ ) |
|----------------------|----------------------------------------------------------------|-------------------------------------------------|
| <b>fathers</b>       |                                                                |                                                 |
| 1222                 | Production and operations department managers in construction  | 0.02                                            |
| 2411                 | Accountants                                                    | 0.11                                            |
| 3433                 | Bookkeepers                                                    | 0.11                                            |
| 8324                 | Heavy truck and lorry drivers                                  | 0.11                                            |
| 8322                 | Car, taxi and van drivers                                      | 0.12                                            |
| 5220                 | Shop salespersons and demonstrators                            | 0.12                                            |
| 3112                 | Civil engineering technicians                                  | 0.12                                            |
| 7141                 | Painters and related workers                                   | 0.12                                            |
| 3415                 | Technical and commercial sales representatives                 | 0.13                                            |
| 2131                 | Computer system designers and analysts                         | 0.13                                            |
| 4190                 | Other office clerks                                            | 0.13                                            |
| 9-83.20 <sup>a</sup> | Railway-engine drivers                                         | 17.88                                           |
| <b>mothers</b>       |                                                                |                                                 |
| 1222                 | Production and operations department managers in construction  | 0.02                                            |
| 3231                 | Nursing associate professionals                                | 0.11                                            |
| 3431                 | Administrative secretaries and related associate professionals | 0.11                                            |
| 5220                 | Shop salespersons and demonstrators                            | 0.12                                            |
| 3211                 | Life science technicians                                       | 0.12                                            |
| 4222                 | Receptionists and information clerks                           | 0.12                                            |
| 4190                 | Other office clerks                                            | 0.13                                            |
| 4121                 | Accounting and bookkeeping clerks                              | 0.13                                            |
| 3310                 | Primary education teaching associate professionals             | 0.13                                            |
| 2131                 | Computer system designers and analysts                         | 0.13                                            |
| 8311                 | Locomotive-engine drivers                                      | 5.48                                            |

Abbreviations: ELF-MF, extremely low-frequency magnetic fields; JEM, job-exposure matrix;  $\mu\text{T}$ , microTesla.

<sup>a</sup> ISCO-68 code

**Supplementary Table 2.** Estimated Risk of Acute Lymphoblastic Leukaemia (ALL) and Acute Myeloid Leukaemia (AML) in the Offspring Following Parental Occupational Exposure to Extremely Low-Frequency Magnetic Fields (ELF-MF) in a Pooled Analysis of Childhood Leukaemia International Consortium (CLIC) Studies. Analysis Stratified by Child's Birth Year.

| ELF-MF exposure, $\mu$ T                                       | Birth date $\leq$ 1990 |                 |           |                |                 |           | Birth date $>$ 1990 |                 |           |                |                 |           |
|----------------------------------------------------------------|------------------------|-----------------|-----------|----------------|-----------------|-----------|---------------------|-----------------|-----------|----------------|-----------------|-----------|
|                                                                | ALL                    |                 |           | AML            |                 |           | ALL                 |                 |           | AML            |                 |           |
|                                                                | Cases/Controls         | OR <sup>a</sup> | 95% CI    | Cases/Controls | OR <sup>a</sup> | 95% CI    | Cases/Controls      | OR <sup>a</sup> | 95% CI    | Cases/Controls | OR <sup>a</sup> | 95% CI    |
| <b>Paternal ELF-MF exposure at conception<sup>b</sup></b>      |                        |                 |           |                |                 |           |                     |                 |           |                |                 |           |
| $\leq$ 0.2                                                     | 3519/6449              | 1.00            |           | 293/4057       | 1.00            |           | 3343/6930           | 1.00            |           | 430/5515       | 1.00            |           |
| $>$ 0.2                                                        | 348/746                | 1.06            | 0.96-1.22 | 54/684         | 1.18            | 0.86-1.60 | 632/1176            | 1.03            | 0.92-1.14 | 78/1025        | 0.99            | 0.76-1.28 |
| $\leq$ 0.1                                                     | 1106/2319              | 1.00            |           | 145/1432       | 1.00            |           | 1297/2671           | 1.00            |           | 168/1858       | 1.00            |           |
| $>$ 0.1- $\leq$ 0.2                                            | 2413/4130              | 1.01            | 0.92-1.11 | 148/2625       | 0.67            | 0.52-0.86 | 2046/4259           | 0.91            | 0.84-1.00 | 262/3657       | 0.90            | 0.73-1.11 |
| $>$ 0.2- $\leq$ 1                                              | 324/672                | 1.10            | 0.94-1.29 | 48/610         | 0.91            | 0.63-1.30 | 612/1120            | 0.98            | 0.86-1.11 | 74/983         | 0.91            | 0.67-1.22 |
| $>$ 1                                                          | 24/74                  | 0.79            | 0.48-1.25 | 6/74           | 1.01            | 0.38-2.23 | 20/56               | 0.79            | 0.46-1.31 | 4/42           | 1.44            | 0.42-3.75 |
| <b>Maternal ELF-MF exposure during pregnancy<sup>b,c</sup></b> |                        |                 |           |                |                 |           |                     |                 |           |                |                 |           |
| $\leq$ 0.2                                                     | 3596/7119              | 1.00            |           | 356/4919       | 1.00            |           | 3797/7847           | 1.00            |           | 501/6377       | 1.00            |           |
| $>$ 0.2                                                        | 195/376                | 1.02            | 0.85-1.22 | 21/256         | 1.16            | 0.70-1.82 | 276/542             | 0.98            | 0.84-1.14 | 24/453         | 0.70            | 0.44-1.05 |
| $\leq$ 0.1                                                     | 2078/4501              | 1.00            |           | 259/3361       | 1.00            |           | 2235/4642           | 1.00            |           | 305/3609       | 1.00            |           |
| $>$ 0.1- $\leq$ 0.2                                            | 1518/2618              | 0.97            | 0.89-1.07 | 97/1558        | 0.85            | 0.65-1.10 | 1562/3205           | 0.98            | 0.90-1.06 | 196/2768       | 0.89            | 0.73-1.09 |
| $>$ 0.2                                                        | 195/376                | 1.01            | 0.84-1.21 | 21/256         | 1.11            | 0.67-1.75 | 276/542             | 0.97            | 0.83-1.14 | 24/453         | 0.67            | 0.42-1.01 |

Abbreviations: ALL, acute lymphoblastic leukaemia; AML, acute myeloid leukaemia;  $\mu$ T, micro Tesla; OR, odds ratio; 95% CI, 95% confidence interval.

<sup>a</sup> Adjusted for child's age and sex, highest level of education of either parent, case accrual time, study.

<sup>b</sup> Median of ELF-MF was used for persons with multiple exposure assignment due to "one-to-many" job title conversion.

<sup>c</sup> Due to small number of exposed cases in the category of  $>$  1  $\mu$ T, it was collapsed with category of  $>$  0.2- $\leq$ 1  $\mu$ T.

**Supplementary Table 3.** Estimated Risk of Acute Lymphoblastic Leukaemia (ALL) and Acute Myeloid Leukaemia (AML) in the Offspring Following Parental Occupational Exposure to Extremely Low-Frequency Magnetic Fields (ELF-MF) in a Pooled Analysis of Childhood Leukaemia International Consortium (CLIC) Studies. Analysis Restricted to Case-Control Studies With Job History Coded to International Standard Classification of Occupations (ISCO) <sup>a</sup>.

| ELF-MF exposure, $\mu$ T                                        | ALL            |                 |           | AML            |                 |           |
|-----------------------------------------------------------------|----------------|-----------------|-----------|----------------|-----------------|-----------|
|                                                                 | Cases/Controls | OR <sup>b</sup> | 95% CI    | Cases/Controls | OR <sup>b</sup> | 95% CI    |
| <b>Paternal ELF-MF exposure at conception <sup>c</sup></b>      |                |                 |           |                |                 |           |
| $\leq 0.2$                                                      | 2678/5739      | 1.00            |           | 331/3688       | 1.00            |           |
| $> 0.2$                                                         | 557/973        | 1.05            | 0.93-1.18 | 64/803         | 0.97            | 0.72-1.29 |
| $\leq 0.1$                                                      | 1156/2650      | 1.00            |           | 159/1326       | 1.00            |           |
| $> 0.1 \leq 0.2$                                                | 1522/3089      | 0.98            | 0.89-1.09 | 172/2362       | 0.85            | 0.66-1.08 |
| $> 0.2 \leq 1$                                                  | 547/943        | 1.04            | 0.91-1.19 | 64/787         | 0.89            | 0.64-1.23 |
| $> 1$                                                           | 10/30          | 0.78            | 0.36-1.56 | 0/16           |                 |           |
| <b>Maternal ELF-MF exposure during pregnancy <sup>c,d</sup></b> |                |                 |           |                |                 |           |
| $\leq 0.2$                                                      | 3017/6333      | 1.00            |           | 375/4247       | 1.00            |           |
| $> 0.2$                                                         | 256/492        | 1.01            | 0.86-1.19 | 21/357         | 0.68            | 0.42-1.06 |
| $\leq 0.1$                                                      | 1828/3997      | 1.00            |           | 231/2382       | 1.00            |           |
| $> 0.1 \leq 0.2$                                                | 1189/2336      | 1.06            | 0.97-1.17 | 144/1865       | 1.00            | 0.79-1.26 |
| $> 0.2$                                                         | 256/492        | 1.03            | 0.88-1.22 | 21/357         | 0.68            | 0.41-1.07 |

*Abbreviations:* ALL, acute lymphoblastic leukaemia; AML, acute myeloid leukaemia;  $\mu$ T, micro Tesla; OR, odds ratio; 95% CI, 95% confidence interval.

<sup>a</sup> Case-control studies with job histories coded to ISCO included Finland, France ADELE, France ESCALE, Greece NARECHEM (1993-1994), Greece NARECHEM (1996-2010), Italy SETIL.

<sup>b</sup> Adjusted for child's age and sex, highest level of education of either parent, case accrual time, study.

<sup>c</sup> Median of ELF-MF was used for persons with multiple exposure assignment due to "one-to-many" job title conversion.

<sup>d</sup> Due to small number of exposed cases in the category of  $> 1 \mu$ T, it was collapsed with category of  $> 0.2 \leq 1 \mu$ T.

**Supplementary Table 4.** Estimated Risk of Acute Lymphoblastic Leukaemia (ALL) and Acute Myeloid Leukaemia (AML) in the Offspring Following Parental Occupational Exposure to Extremely Low-Frequency Magnetic Fields (ELF-MF) in a Pooled Analysis of Childhood Leukaemia International Consortium (CLIC) studies. Analysis Stratified by Child's Sex.

| ELF-MF exposure, $\mu\text{T}$                                 | Boys           |                 |           |                |                 |           | Girls          |                 |           |                |                 |           |
|----------------------------------------------------------------|----------------|-----------------|-----------|----------------|-----------------|-----------|----------------|-----------------|-----------|----------------|-----------------|-----------|
|                                                                | ALL            |                 |           | AML            |                 |           | ALL            |                 |           | AML            |                 |           |
|                                                                | Cases/Controls | OR <sup>a</sup> | 95% CI    |
| <b>Paternal ELF-MF exposure at conception<sup>b</sup></b>      |                |                 |           |                |                 |           |                |                 |           |                |                 |           |
| ≤ 0.2                                                          | 3810/7404      | 1.00            |           | 382/5366       | 1.00            |           | 3052/5975      | 1.00            |           | 341/4206       | 1.00            |           |
| > 0.2                                                          | 565/1061       | 1.10            | 0.98-1.23 | 62/935         | 1.00            | 0.74-1.32 | 415/861        | 0.96            | 0.85-1.10 | 70/774         | 1.13            | 0.85-1.49 |
| ≤ 0.1                                                          | 1301/2742      | 1.00            |           | 182/1841       | 1.00            |           | 1102/2248      | 1.00            |           | 131/1449       | 1.00            |           |
| > 0.1-≤ 0.2                                                    | 2509/4662      | 0.99            | 0.91-1.08 | 200/3525       | 0.68            | 0.54-0.85 | 1950/3727      | 0.92            | 0.83-1.01 | 210/2757       | 1.01            | 0.79-1.28 |
| > 0.2-≤ 1                                                      | 540/985        | 1.12            | 0.98-1.27 | 56/867         | 0.77            | 0.55-1.05 | 396/807        | 0.92            | 0.80-1.07 | 66/726         | 1.12            | 0.80-1.55 |
| > 1                                                            | 2576           | 0.81            | 0.50-1.28 | 6/68           | 1.04            | 0.39-2.29 | 19/54          | 0.76            | 0.44-1.28 | 4/48           | 1.40            | 0.41-3.59 |
| <b>Maternal ELF-MF exposure during pregnancy<sup>b,c</sup></b> |                |                 |           |                |                 |           |                |                 |           |                |                 |           |
| ≤ 0.2                                                          | 4146/8276      | 1.00            |           | 445/6302       | 1.00            |           | 3247/6690      | 1.00            |           | 412/4994       | 1.00            |           |
| > 0.2                                                          | 257/504        | 0.97            | 0.82-1.13 | 25/392         | 0.92            | 0.59-1.39 | 214/414        | 1.04            | 0.87-1.24 | 20/317         | 0.76            | 0.46-1.20 |
| ≤ 0.1                                                          | 2425/5036      | 1.00            |           | 292/3889       | 1.00            |           | 1888/4107      | 1.00            |           | 272/3081       | 1.00            |           |
| > 0.1-≤ 0.2                                                    | 1721/3240      | 0.96            | 0.88-1.04 | 153/2413       | 0.93            | 0.75-1.16 | 1359/2583      | 1.00            | 0.91-1.09 | 140/1913       | 0.85            | 0.67-1.06 |
| > 0.2                                                          | 257/504        | 0.95            | 0.81-1.12 | 25/392         | 0.90            | 0.57-1.36 | 214/414        | 1.04            | 0.87-1.24 | 20/317         | 0.72            | 0.43-1.14 |

Abbreviations: ALL, acute lymphoblastic leukaemia; AML, acute myeloid leukaemia;  $\mu\text{T}$ , micro Tesla; OR, odds ratio; 95% CI, 95% confidence interval.

<sup>a</sup> Adjusted for child's age, highest level of education of either parent, case accrual time, study.

<sup>b</sup> Median of ELF-MF was used for persons with multiple exposure assignment due to "one-to-many" job title conversion.

<sup>c</sup> Due to small number of exposed cases in the category of > 1  $\mu\text{T}$ , it was collapsed with category of > 0.2-≤ 1  $\mu\text{T}$ .

**Supplementary Table 5.** Estimated Risk of Acute Lymphoblastic Leukaemia (ALL) and Acute Myeloid Leukaemia (AML) in the Offspring Following Parental Occupational Exposure to Extremely Low-Frequency Magnetic Fields (ELF-MF) in a Pooled Analysis of Childhood Leukaemia International Consortium (CLIC) studies. Analysis Stratified by Child's Age <sup>a</sup>.

| ELF-MF exposure, $\mu\text{T}$ <sup>b</sup>                   | < 5 years old  |                 |           |                |                 |           | $\geq$ 5 years old |                 |           |                |                 |           |
|---------------------------------------------------------------|----------------|-----------------|-----------|----------------|-----------------|-----------|--------------------|-----------------|-----------|----------------|-----------------|-----------|
|                                                               | ALL            |                 |           | AML            |                 |           | ALL                |                 |           | AML            |                 |           |
|                                                               | Cases/Controls | OR <sup>c</sup> | 95% CI    | Cases/Controls | OR <sup>c</sup> | 95% CI    | Cases/Controls     | OR <sup>c</sup> | 95% CI    | Cases/Controls | OR <sup>c</sup> | 95% CI    |
| <b>Paternal ELF-MF exposure at conception</b>                 |                |                 |           |                |                 |           |                    |                 |           |                |                 |           |
| $\leq 0.2$                                                    | 3934/7349      | 1.00            |           | 335/5148       | 1.00            |           | 2928/6030          | 1.00            |           | 386/4416       | 1.00            |           |
| $> 0.2$                                                       | 564/1063       | 1.00            | 0.90-1.13 | 60/928         | 1.04            | 0.77-1.38 | 416/859            | 1.08            | 0.95-1.23 | 72/780         | 1.15            | 0.87-1.50 |
| $\leq 0.1$                                                    | 1344/2719      | 1.00            |           | 131/1752       | 1.00            |           | 1059/2271          | 1.00            |           | 180/1532       | 1.00            |           |
| $> 0.1 \leq 0.2$                                              | 2590/4630      | 0.99            | 0.91-1.08 | 204/3396       | 0.91            | 0.72-1.15 | 1869/3759          | 0.92            | 0.83-1.02 | 206/2884       | 0.76            | 0.61-0.94 |
| $> 0.2 \leq 1$                                                | 541/993        | 1.02            | 0.89-1.16 | 57/866         | 0.99            | 0.70-1.37 | 395/799            | 1.03            | 0.89-1.20 | 65/726         | 0.93            | 0.68-1.27 |
| $> 1$                                                         | 23/70          | 0.73            | 0.44-1.17 | 3/62           | 0.85            | 0.20-2.36 | 21/60              | 0.86            | 0.51-1.41 | 7/54           | 1.49            | 0.60-3.17 |
| <b>Maternal ELF-MF exposure during pregnancy <sup>e</sup></b> |                |                 |           |                |                 |           |                    |                 |           |                |                 |           |
| $\leq 0.2$                                                    | 4162/8161      | 1.00            |           | 394/6065       | 1.00            |           | 3231/6805          | 1.00            |           | 461/5222       | 1.00            |           |
| $> 0.2$                                                       | 288/514        | 1.05            | 0.90-1.22 | 21/390         | 0.83            | 0.51-1.28 | 183/404            | 0.94            | 0.78-1.13 | 24/319         | 0.84            | 0.53-1.27 |
| $\leq 0.1$                                                    | 2305/4845      | 1.00            |           | 258/3666       | 1.00            |           | 2008/4298          | 1.00            |           | 304/3296       | 1.00            |           |
| $> 0.1 \leq 0.2$                                              | 1857/3316      | 1.04            | 0.96-1.13 | 136/2399       | 0.83            | 0.66-1.03 | 1223/2507          | 0.90            | 0.82-0.99 | 157/1926       | 0.98            | 0.79-1.21 |
| $> 0.2$                                                       | 288/514        | 1.07            | 0.91-1.25 | 21/390         | 0.77            | 0.47-1.20 | 183/404            | 0.90            | 0.75-1.09 | 24/319         | 0.84            | 0.53-1.27 |

*Abbreviations:* ALL, acute lymphoblastic leukaemia; AML, acute myeloid leukaemia;  $\mu\text{T}$ , micro Tesla; OR, odds ratio; 95% CI, 95% confidence interval.

<sup>a</sup> Child's age at the index date: for cases, the date of diagnosis; and for controls either the date of recruitment or the date of questionnaire return.

<sup>b</sup> Median of ELF-MF was used for persons with multiple exposure assignment due to "one-to-many" job title conversion.

<sup>c</sup> Adjusted for child's sex, highest level of education of either parent, case accrual time, study.

<sup>e</sup> Due to small number of exposed cases in the category of  $> 1 \mu\text{T}$ , it was collapsed with category of  $> 0.2 \leq 1 \mu\text{T}$ .

**Supplementary Table 6.** Estimated Risk of Acute Lymphoblastic Leukaemia (ALL) and Acute Myeloid Leukaemia (AML) in the Offspring Following Parental Occupational Exposure to Extremely Low-Frequency Magnetic Fields (ELF-MF) in a Pooled Analysis of Childhood Leukaemia International Consortium (CLIC) Studies. Analysis by Using 0  $\mu$ T and 0.4  $\mu$ T as Cut-Off Points for Dichotomous ELF-MF Exposure.

| ELF-MF exposure, $\mu$ T                                     | ALL            |                 |           | ALL T-lineage  |                 |           | ALL B-lineage  |                 |           | AML            |                 |           |
|--------------------------------------------------------------|----------------|-----------------|-----------|----------------|-----------------|-----------|----------------|-----------------|-----------|----------------|-----------------|-----------|
|                                                              | Cases/Controls | OR <sup>a</sup> | 95% CI    |
| <b>Paternal ELF-MF exposure at conception<sup>b</sup></b>    |                |                 |           |                |                 |           |                |                 |           |                |                 |           |
| ≤ 0.4                                                        | 7571/14743     | 1.00            |           | 693/12170      | 1.00            |           | 5200/12170     | 1.00            |           | 817/10783      | 1.00            |           |
| > 0.4                                                        | 271/558        | 1.07            | 0.92-1.25 | 29/493         | 1.09            | 0.72-1.59 | 211/493        | 1.11            | 0.93-1.31 | 38/498         | 1.05            | 0.73-1.47 |
| <b>Maternal ELF-MF exposure during pregnancy<sup>b</sup></b> |                |                 |           |                |                 |           |                |                 |           |                |                 |           |
| ≤ 0.4                                                        | 7794/15726     | 1.00            |           | 727/13140      | 1.00            |           | 5416/13140     | 1.00            |           | 895/11890      | 1.00            |           |
| > 0.4                                                        | 70/158         | 1.00            | 0.75-1.33 | 5/106          | 0.79            | 0.28-1.78 | 41/106         | 0.96            | 0.65-1.37 | 7/115          | 0.76            | 0.31-1.57 |

Abbreviations: ALL, acute lymphoblastic leukaemia; AML, acute myeloid leukaemia;  $\mu$ T, micro Tesla; OR, odds ratio; 95% CI, 95% confidence interval.

<sup>a</sup> Adjusted for child's age and sex, highest level education of either parent, case accrual time, study.

<sup>b</sup> Median of ELF-MF was used for persons with multiple exposure assignment due to "one-to-many" job title conversion.

**Supplementary Figure 1.** Paternal occupational ELF-MF exposure at conception and leukaemia in the offspring.

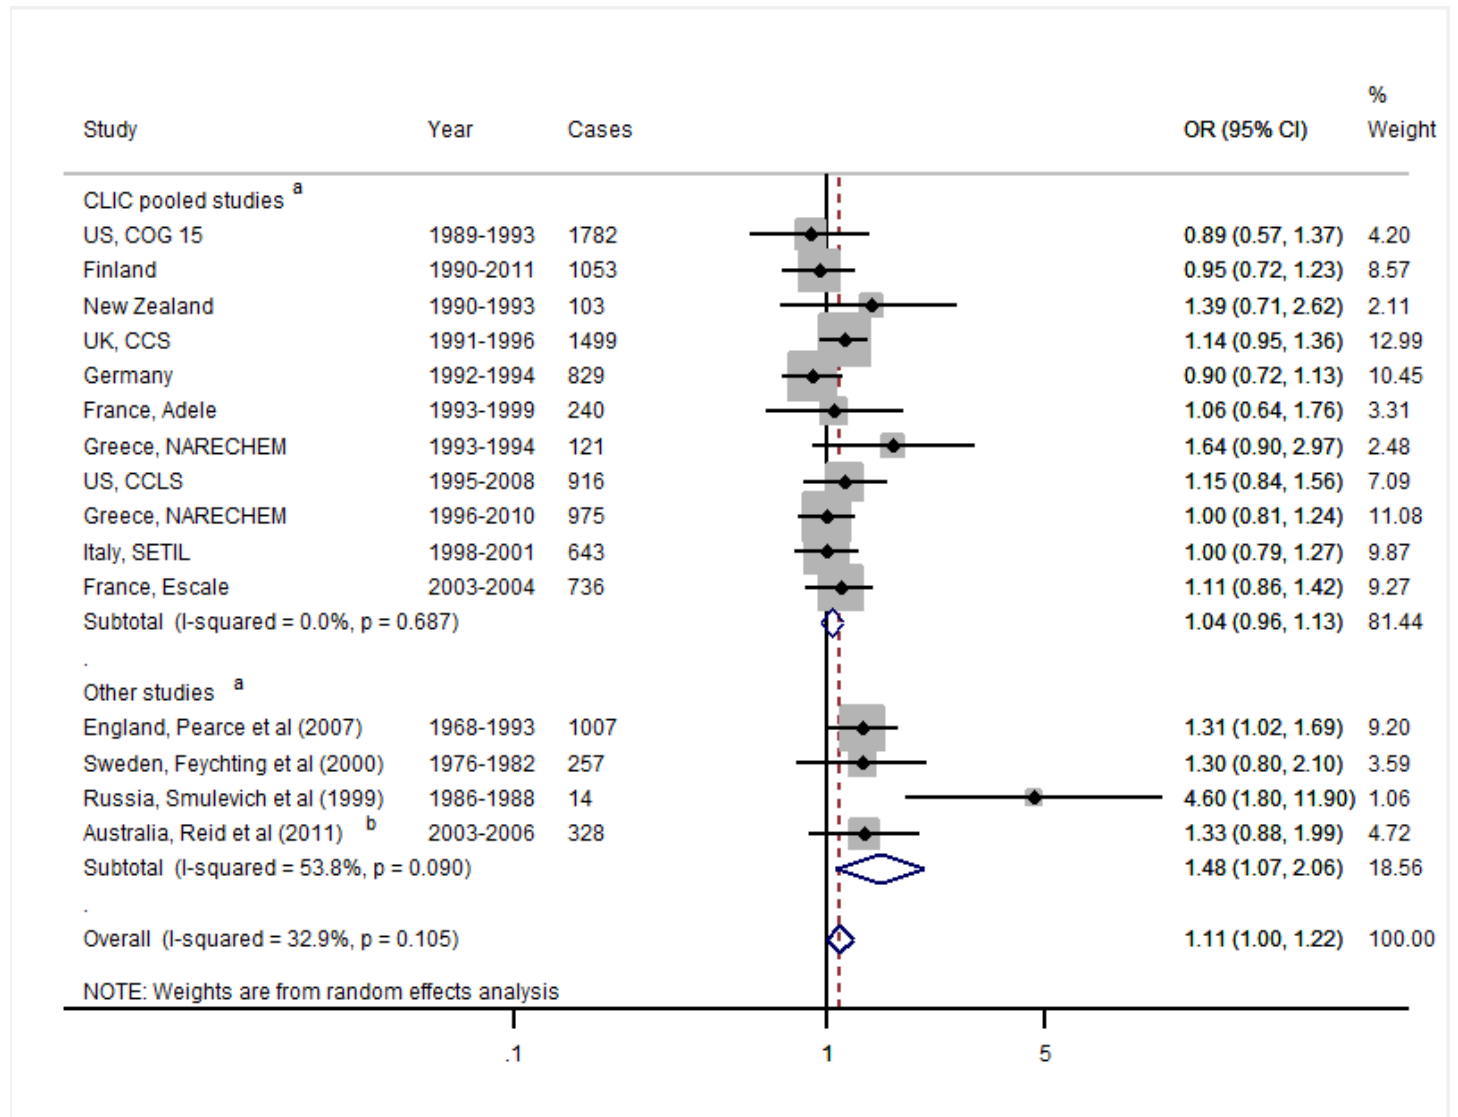

<sup>a</sup> CLIC pooled studies used a harmonized exposure metric while the other studies used individual and different metrics.

<sup>b</sup> Reid et al (2011) reported OR estimates only for ALL, not overall leukaemia.

**Supplementary Figure 2.** Maternal occupational ELF-MF exposure during pregnancy and leukaemia in the offspring.

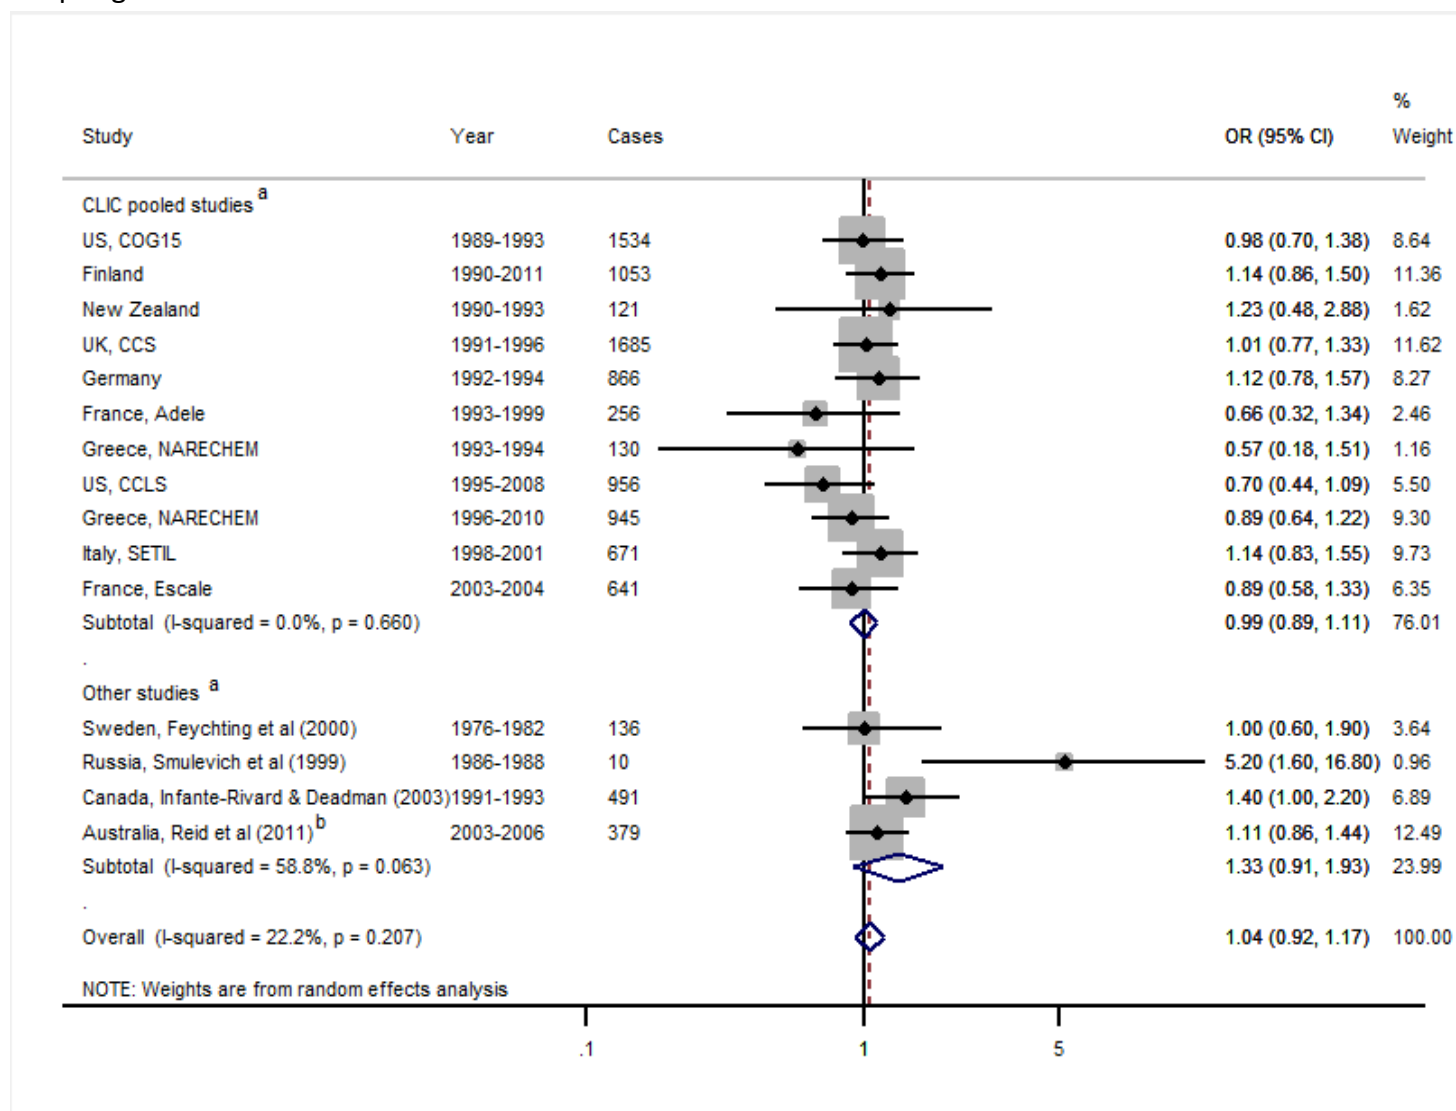

<sup>a</sup> CLIC pooled studies used a harmonized exposure metric while the other studies used individual and different metrics.

<sup>b</sup> Reid et al (2011) reported OR estimates only for ALL, not overall leukaemia.



**Supplementary Figure 3.** Funnel plot for paternal occupational ELF-MF exposure at conception and leukaemia in the offspring.

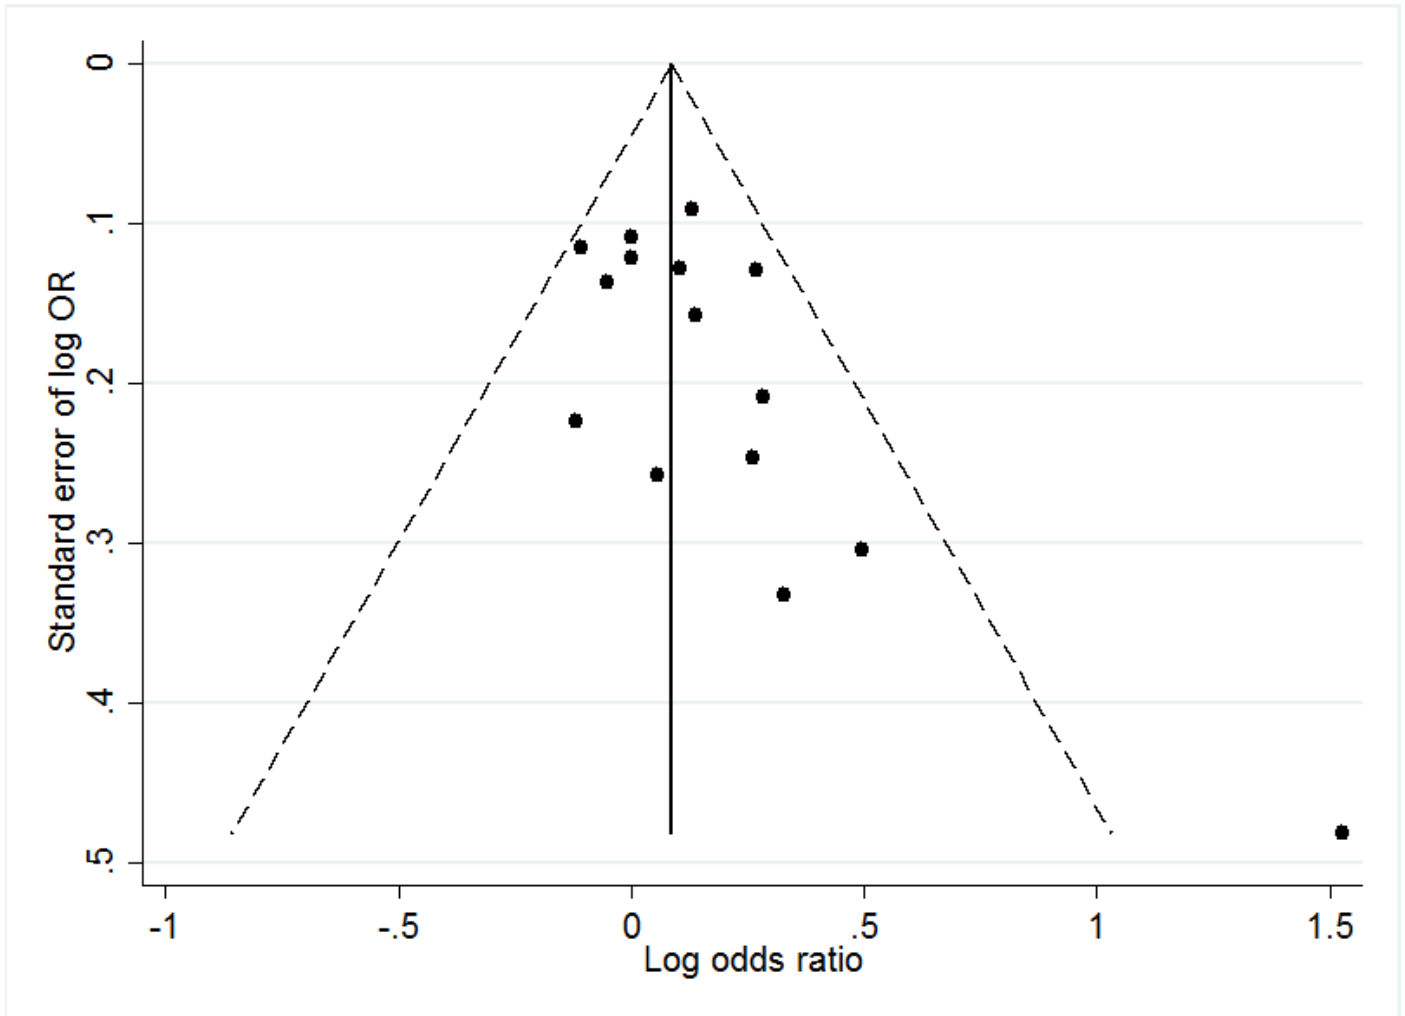

**Supplementary Figure 4.** Funnel plot for maternal occupational ELF-MF exposure during pregnancy and leukaemia in the offspring.

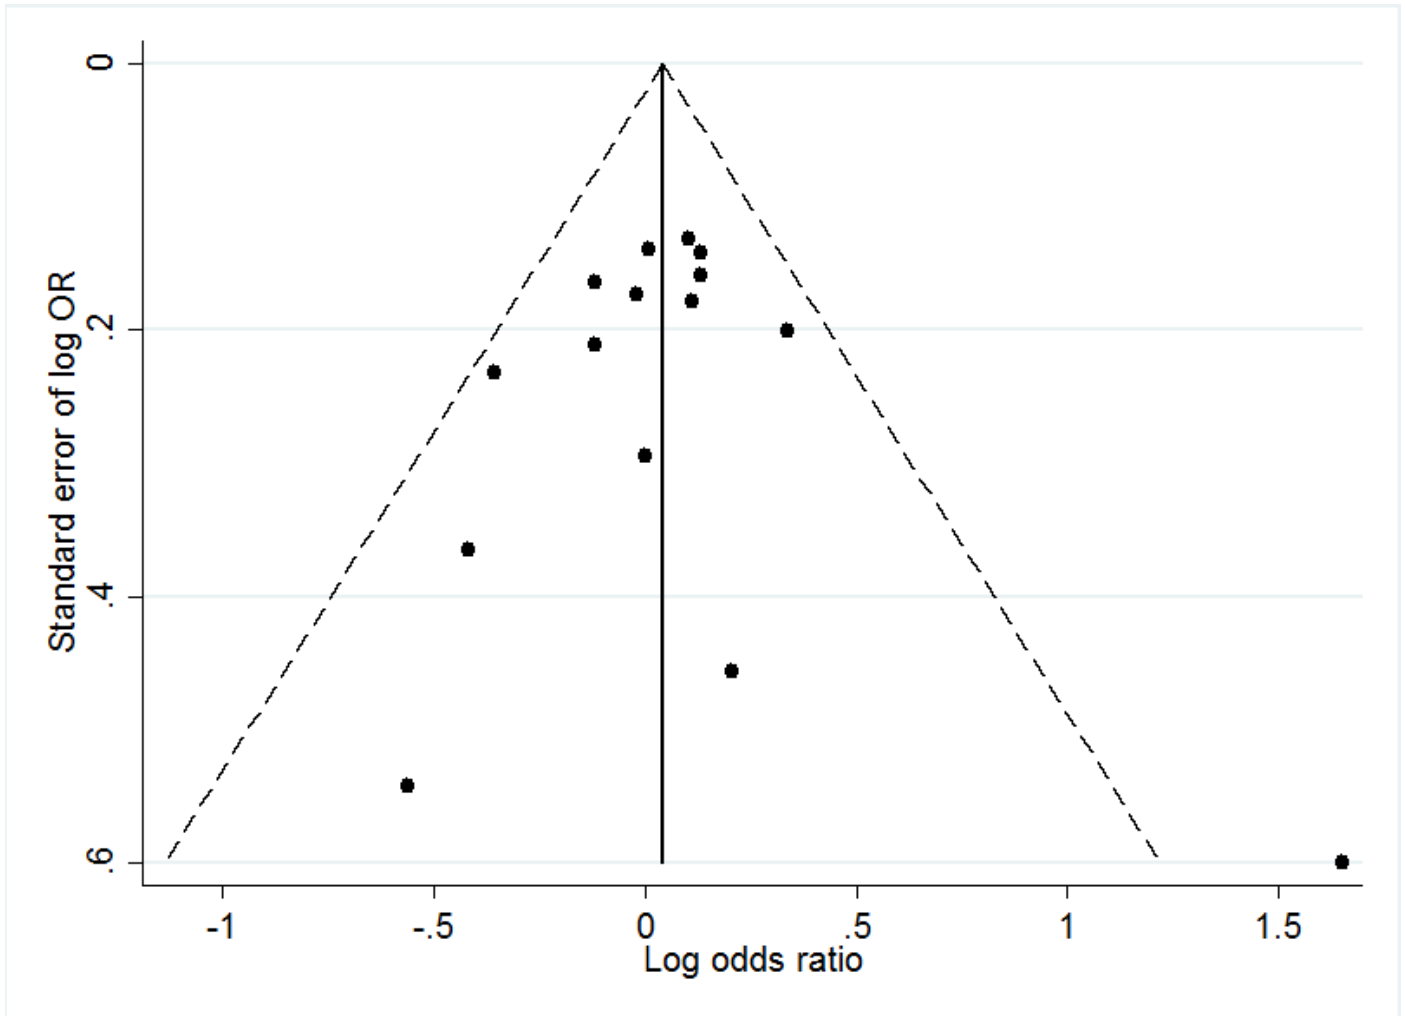

Supplement: inline-supplementary-material-1 [file inline-supplementary-material-1.pdf]
